# Supplementary material
Source: PubMed Central journal article supplement (PMC2648868)
Supplement: NIHMS91465-supplement-1_si_001.pdf [file NIHMS91465-supplement-1_si_001.pdf]

## Supporting Information

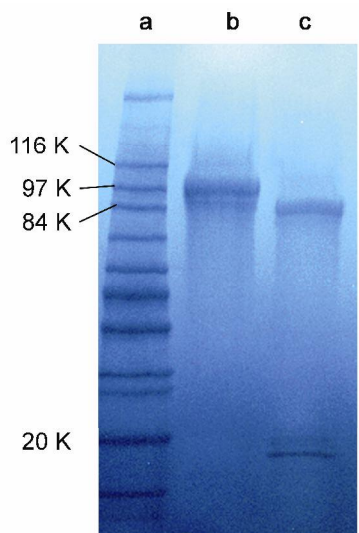

**Figure S1** Copper stained SDS-PAGE gel of thrombin cleavage of apoCaM-ELP180. Lanes: a) Molecular weight markers; b) apoCaM-ELP180 (MW: 90.5 kDa) and c) apoCaM-ELP180 after cleavage with thrombin. Note that in lane c, two major bands are observed, corresponding to apoCaM (16.7 kDa) and ELP (73.8 kDa).

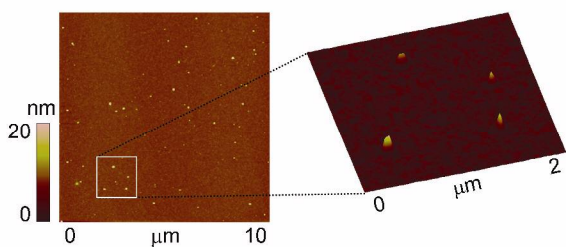

**Figure S2** Tapping mode AFM image in air of a 1  $\mu\text{M}$  solution of apoCaM-ELP60 in water that was adsorbed onto a PAH monolayer on silicon and freeze-dried prior to imaging. The inset is a 2x2  $\mu\text{m}$  magnified view.

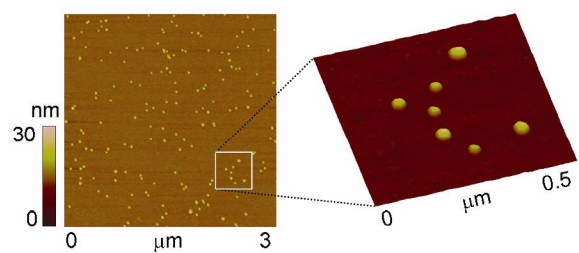

**Figure S3.** Tapping mode AFM image in air of 10 nm diameter spherical gold nanoparticles (Ted Pella Inc., Redding, CA) at an imaging speed of 2  $\mu\text{m/s}$ . The inset is a 0.5x 0.5  $\mu\text{m}$  magnified view.
